# Supplementary material for: All Wales Injury Surveillance System revised: development of a population-based system to evaluate single-level and multilevel interventions
Source: HighWire-hosted journal article supplement (doi:10.1136/injuryprev-2015-041814), 2015-12-09
Supplement: injuryprev-2015-041814supp.pdf [file injuryprev-2015-041814supp.pdf]

**Supplementary Table1:** Rates per 100,000 population for injury related GP events, ED attendances and inpatient admissions, in Wales.

| Age     | Injury Related GP Events <sup>1</sup><br>01/01/2013 - 31/12/2013<br>(Rate per 100,000 Population) |          |          | Injury Related ED Attendance <sup>2</sup><br>01/01/2014 - 31/12/2014 (counts) |       |       | Injury Related ED Attendances <sup>3</sup><br>01/01/2014 - 31/12/2014<br>(Rate per 100,000 Population) |          |          | Injury Related Inpatient Admissions <sup>4</sup><br>01/01/2014 - 31/12/2014 (Counts) |      |      | Injury Related Inpatient Admissions <sup>5</sup><br>01/01/2014 - 31/12/2014 (Rate per<br>100,000 Population) |         |         |
|---------|---------------------------------------------------------------------------------------------------|----------|----------|-------------------------------------------------------------------------------|-------|-------|--------------------------------------------------------------------------------------------------------|----------|----------|--------------------------------------------------------------------------------------|------|------|--------------------------------------------------------------------------------------------------------------|---------|---------|
|         | M                                                                                                 | F        | All      | M                                                                             | F     | ALL   | M                                                                                                      | F        | All      | M                                                                                    | F    | All  | M                                                                                                            | F       | All     |
| 0 - 4   | 7768.39                                                                                           | 6486.18  | 7147.55  | 14207                                                                         | 11163 | 25370 | 15598.55                                                                                               | 12890.9  | 14278.88 | 1926                                                                                 | 1555 | 3481 | 2114.65                                                                                                      | 1795.69 | 1959.20 |
| 5 - 9   | 6323.98                                                                                           | 5580.82  | 5960.02  | 12664                                                                         | 10557 | 23221 | 14024.98                                                                                               | 12271.59 | 13169.51 | 1149                                                                                 | 750  | 1899 | 1272.48                                                                                                      | 871.81  | 1076.99 |
| 10 - 14 | 9836.92                                                                                           | 7457.73  | 8684.22  | 20618                                                                         | 15360 | 35978 | 24275.61                                                                                               | 19162.15 | 21792.83 | 1158                                                                                 | 897  | 2055 | 1363.43                                                                                                      | 1119.04 | 1244.77 |
| 15 - 19 | 8698.06                                                                                           | 7271.50  | 8000.94  | 18309                                                                         | 12489 | 30798 | 18856.79                                                                                               | 13671.29 | 16343.06 | 1340                                                                                 | 1238 | 2578 | 1380.09                                                                                                      | 1355.20 | 1368.02 |
| 20 - 24 | 8291.64                                                                                           | 7368.39  | 7839.34  | 18156                                                                         | 12034 | 30190 | 16206.81                                                                                               | 11401.12 | 13875.48 | 1668                                                                                 | 982  | 2650 | 1488.93                                                                                                      | 930.36  | 1217.95 |
| 25 - 29 | 7828.49                                                                                           | 6823.61  | 7332.89  | 15182                                                                         | 10038 | 25220 | 15564.26                                                                                               | 10615.82 | 13128.51 | 1470                                                                                 | 732  | 2202 | 1507.01                                                                                                      | 774.14  | 1146.27 |
| 30 - 34 | 6922.85                                                                                           | 6445.62  | 6688.37  | 12431                                                                         | 8636  | 21067 | 13679.98                                                                                               | 9469.091 | 11570.7  | 1189                                                                                 | 684  | 1873 | 1308.46                                                                                                      | 749.98  | 1028.71 |
| 35 - 39 | 6059.84                                                                                           | 6205.23  | 6131.00  | 9720                                                                          | 7729  | 17449 | 11669.65                                                                                               | 9151.728 | 10401.97 | 997                                                                                  | 624  | 1621 | 1196.98                                                                                                      | 738.86  | 966.34  |
| 40 - 44 | 5897.84                                                                                           | 6319.49  | 6104.82  | 10170                                                                         | 8764  | 18934 | 10570.08                                                                                               | 8734.216 | 9632.878 | 1201                                                                                 | 802  | 2003 | 1248.25                                                                                                      | 799.27  | 1019.05 |
| 45 - 49 | 5354.61                                                                                           | 6030.72  | 5686.54  | 9445                                                                          | 8763  | 18208 | 8860.225                                                                                               | 7879.475 | 8359.464 | 1180                                                                                 | 906  | 2086 | 1106.94                                                                                                      | 814.65  | 957.70  |
| 50 - 54 | 5221.20                                                                                           | 6457.63  | 5829.81  | 8337                                                                          | 8517  | 16854 | 7875.347                                                                                               | 7757.113 | 7815.152 | 1188                                                                                 | 965  | 2153 | 1122.22                                                                                                      | 878.90  | 998.34  |
| 55 - 59 | 4848.38                                                                                           | 6901.63  | 5875.71  | 6462                                                                          | 6893  | 13355 | 6852.307                                                                                               | 7005.793 | 6930.678 | 1083                                                                                 | 852  | 1935 | 1148.41                                                                                                      | 865.94  | 1004.18 |
| 60 - 64 | 4846.40                                                                                           | 6306.33  | 5578.72  | 5296                                                                          | 5833  | 11129 | 5776.425                                                                                               | 6085.55  | 5934.422 | 977                                                                                  | 869  | 1846 | 1065.63                                                                                                      | 906.62  | 984.36  |
| 65 - 69 | 5116.81                                                                                           | 7175.26  | 6164.04  | 4805                                                                          | 5788  | 10593 | 5094.576                                                                                               | 5875.128 | 5493.354 | 1217                                                                                 | 1193 | 2410 | 1290.34                                                                                                      | 1210.96 | 1249.79 |
| 70 - 74 | 5878.52                                                                                           | 8221.93  | 7095.64  | 3757                                                                          | 4891  | 8648  | 5365.457                                                                                               | 6470.176 | 5938.949 | 1244                                                                                 | 1377 | 2621 | 1776.58                                                                                                      | 1821.60 | 1799.95 |
| 75 - 79 | 7642.64                                                                                           | 10137.34 | 8981.93  | 3238                                                                          | 4983  | 8221  | 6089.099                                                                                               | 8111.408 | 7173.084 | 1487                                                                                 | 1988 | 3475 | 2796.32                                                                                                      | 3236.10 | 3032.05 |
| 80 - 84 | 9340.66                                                                                           | 13600.40 | 11769.47 | 2713                                                                          | 4984  | 7697  | 7680.983                                                                                               | 10491.97 | 9293.2   | 1617                                                                                 | 2704 | 4321 | 4578.01                                                                                                      | 5692.27 | 5217.09 |

|       |          |          |          |        |        |        |          |          |          |       |       |       |         |          |          |
|-------|----------|----------|----------|--------|--------|--------|----------|----------|----------|-------|-------|-------|---------|----------|----------|
| 85+   | 14107.75 | 17211.13 | 16156.82 | 3042   | 8017   | 11059  | 11402.65 | 15361.77 | 14022.52 | 2545  | 5741  | 8286  | 9539.70 | 11000.61 | 10506.43 |
| Total | 6790.35  | 7402.04  | 7097.29  | 178552 | 155439 | 333991 | 11736.69 | 9896.029 | 10801.65 | 24636 | 24859 | 49495 | 1619.39 | 1582.65  | 1600.73  |

<sup>1</sup> Rates based on all injury related GP events (e.g. events may include letters and phone conversations in addition to visits). The list of injury related READ codes used in these figures can be requested from the author. Population estimates are based on the number of people registered with a SAIL GP practice on 31/07/2013.

<sup>2</sup> Counts of injury related Emergency Department attendances for Welsh residents (16 attendances were excluded as they lacked either sex or age demographics)

<sup>3</sup> Rates are based on injury related Emergency Department attendances for Welsh Residents. Population estimates based on ONS 2014 Mid-year estimates for Wales

<sup>4</sup> Counts of injury related inpatient admissions for Welsh Residents. The list of injury related ICD10 codes can be found in the appendix

<sup>5</sup> Rates are based on injury related inpatient admissions for Welsh Residents. Population estimates based on ONS 2014 Mid-year estimates for Wales

Appendix 1: Emergency Department Data Set codes used in the analysis to calculate counts and rates of Emergency Department attendances in Supplementary Table 1

| <b>Injury codes</b> | <b>Injury Description</b>          |
|---------------------|------------------------------------|
| 01A                 | Laceration                         |
| 01B                 | Contusion                          |
| 01C                 | Abrasion                           |
| 01D                 | Soft tissue inflammation           |
| 01Z                 | Wound, other or unspecified        |
|                     | Head Injury                        |
| 02A                 | Glasgow Coma Score 15              |
| 02B                 | Glasgow Coma Score <15             |
| 02C                 | Dental Injury                      |
| 02Z                 | Head Injury, other or unspecified  |
|                     | Fracture                           |
| 03A                 | Open Fracture                      |
| 03B                 | Closed Fracture                    |
| 03C                 | Fracture Dislocation               |
| 03Z                 | Fracture, other or unspecified     |
|                     | Joint Injury                       |
| 04A                 | Sprain                             |
| 04B                 | Dislocation                        |
| 04C                 | Subluxation                        |
| 04Z                 | Joint Injury, other or unspecified |
|                     | Amputation                         |
| 05Z                 | Amputation, other or unspecified   |
|                     | Soft Tissue Injury                 |
| 06A                 | Muscle Injury                      |
| 06B                 | Tendon Injury                      |

|     |                                                            |
|-----|------------------------------------------------------------|
| 06C | Nerve Injury                                               |
| 06D | Visceral Injury                                            |
| 06E | Vascular Injury                                            |
| 06Z | Soft Tissue Injury, other or unspecified                   |
|     | Burns, Scalds and Thermal Conditions                       |
| 07A | Electric                                                   |
| 07B | Chemical                                                   |
| 07C | Radiation                                                  |
| 07D | Scald                                                      |
| 07E | Sunburn                                                    |
| 07F | Hyperthermia                                               |
| 07G | Hypothermia                                                |
| 07H | Frostbite                                                  |
| 07Z | Burns, Scalds and Thermal Conditions, other or unspecified |
|     | Foreign Body                                               |
| 08A | Ingested Foreign Body                                      |
| 08Z | Foreign Body, other or unspecified                         |
|     | Puncture Wounds                                            |
| 09A | Needle Stick Injury                                        |
| 09B | Human Bite                                                 |
| 09C | Animal Bite                                                |
| 09D | Insect Bite or Sting                                       |
| 09Z | Puncture Wounds, other or unspecified                      |
|     | Poisoning or Overdose                                      |
| 10A | Alcohol                                                    |
| 10B | Prescribed Drug                                            |
| 10C | Non-prescribed/purchased drug                              |
| 10D | Illicit Drug                                               |
| 10Z | Poisoning or Overdose, other or unspecified                |
|     | Drowning                                                   |
| 11A | Near Drowning                                              |

|     |                                |
|-----|--------------------------------|
| 11Z | Drowning, other or unspecified |
| 03Z | Wound closure                  |
| 04Z | Removal foreign body           |
| 06Z | Manipulation                   |

Appendix 2: Injury codes used to calculate counts and rate of injury related inpatient admissions

| ICD10 injury codes | Sub-chapter description                                                                                                                                                                                                                                                                                                                                                                                                                                                                                                                                                                                         |
|--------------------|-----------------------------------------------------------------------------------------------------------------------------------------------------------------------------------------------------------------------------------------------------------------------------------------------------------------------------------------------------------------------------------------------------------------------------------------------------------------------------------------------------------------------------------------------------------------------------------------------------------------|
| S00-S99            | Injuries to anatomical area                                                                                                                                                                                                                                                                                                                                                                                                                                                                                                                                                                                     |
| T00-T73, T75, T78  | Injuries involving multiple body regions, Injuries to unspecified part of trunk, limb or body region, Effects of foreign body entering through natural orifice, Burns and corrosions, Frostbite, Poisoning by drugs, medicaments and biological substances, Toxic effects of substances chiefly nonmedicinal as to source, Unspecified effect of radiation, Effects of heat and light , Hypothermia , Other effects of reduced temperature, Effects of air pressure and water pressure, Asphyxiation, Effects of other deprivation, Effects of other external causes, Adverse effects, not elsewhere classified |
| V01-V99            | Transport Accidents                                                                                                                                                                                                                                                                                                                                                                                                                                                                                                                                                                                             |
| W00- X59           | Other external causes of accidental injury                                                                                                                                                                                                                                                                                                                                                                                                                                                                                                                                                                      |
| X60-X84            | Intentional self-harm                                                                                                                                                                                                                                                                                                                                                                                                                                                                                                                                                                                           |
| X85- Y09           | Assault                                                                                                                                                                                                                                                                                                                                                                                                                                                                                                                                                                                                         |
| Y10 - Y34          | Event of undetermined intent                                                                                                                                                                                                                                                                                                                                                                                                                                                                                                                                                                                    |
| F10.0 - F19.0      | Mental and behavioural disorders due to psychoactive substance use. *Only acute intoxication were included                                                                                                                                                                                                                                                                                                                                                                                                                                                                                                      |
